# Supplementary material for: Folic acid conjugated chitosan for targeted delivery of siRNA to activated macrophages in vitro and in vivo
Source: Royal Society of Chemistry journal article supplement (doi:10.1039/c4tb01374c), 2014-10-03
Supplement: c4tb01374c1.pdf [file c4tb01374c1.pdf]

## Folic Acid Conjugated Chitosan for Targeted Delivery of siRNA to Activated Macrophages *in vitro* and *in vivo*

Chuanxu Yang<sup>†,‡</sup>, Shan Gao<sup>†,‡</sup>, Jørgen Kjems<sup>†,‡\*</sup>

<sup>†</sup>*Interdisciplinary Nanoscience Center (iNANO),*

<sup>‡</sup>*Department of Molecular Biology and Genetics, Aarhus University, DK-8000 Aarhus C, Denmark*

### Supplementary Materials

Suppl. Fig 1

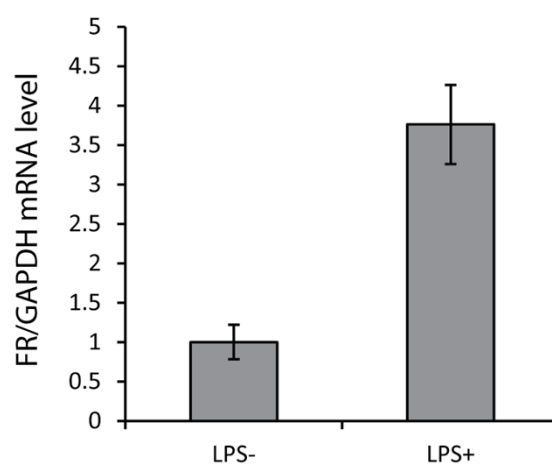

**Suppl. Fig 1.** Quantification of folate receptor expression by qPCR. The expression of FR in LPS stimulated cells (LPS+) is approximately 3.8-fold of the one of cells without stimulation (LPS-).

**Suppl. Fig 2**

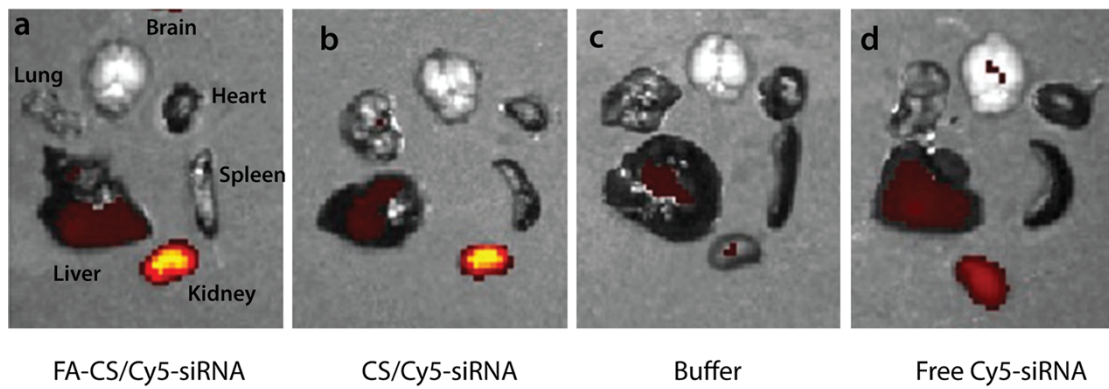

**Suppl. Fig 2.** Biodistribution of nanoparticles in organs. Optical imaging of organs from mice at 24 h post-injection of (a) FA-CS/siRNA, (b) CS/siRNA, (c) buffer or (d) naked siRNA.
